# Supplementary material
Source: Springer Nature journal article supplement (https://www.springermedizin.de/resource/supplementary/13601_2014_1058_MOESM9_ESM.pdf/9678622)
Supplement: MOESM9 [file 9678622]

## Asthma self-report

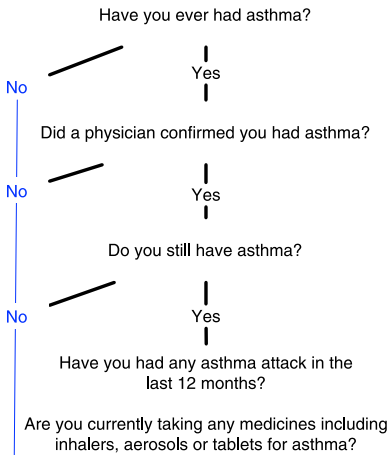

Consider using additional popular expressions for asthma such as "asthmatic bronchitis" or "allergic bronchitis"?

Consider asking "When has the physician stated you had asthma"?

Consider using last 12 months or last month instead of currently.

## Asthma symptoms

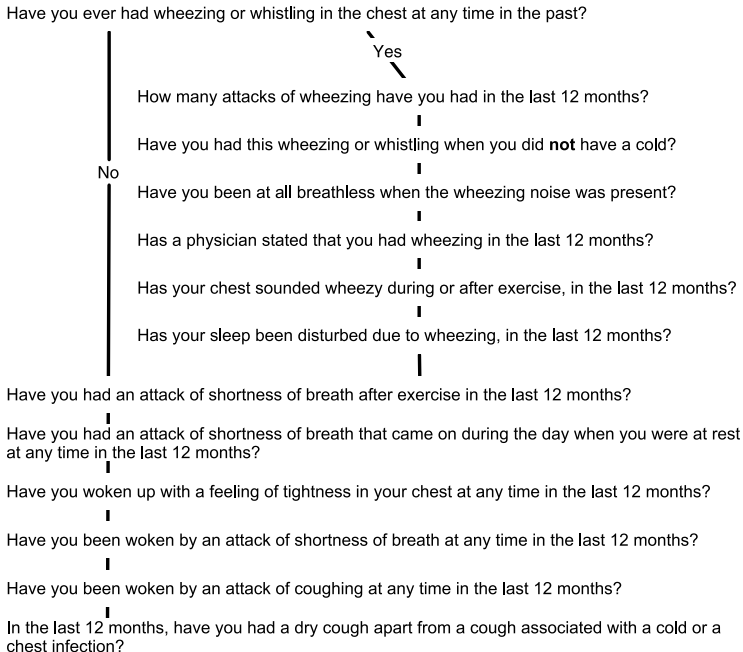

Consider including chronic bronchitis and allergic rhinitis questions such as "Have you been coughing constantly for more than 3 weeks in any time in your life?" and "Do you have any nasal allergies, including hay fever?"
